# Supplementary material for: Effect of Artificial Intelligence Tutoring vs Expert Instruction on Learning Simulated Surgical Skills Among Medical Students: A Randomized Clinical Trial
Source: PubMed Central journal article supplement (PMC8864513; doi:10.1001/jamanetworkopen.2021.49008), 2022-02-22
Supplement: jamanetwopen-e2149008-s001.pdf [file jamanetwopen-e2149008-s001.pdf]

1 Study Protocol and Statistical Analysis Plan

2

3 **Effectiveness of an Artificial Intelligent Tutoring System in Simulation Training**

---

4

5 ClinicalTrials.gov Identifier: NCT04700384

6

7 Recruitment Status: Completed

8 First Posted: January 7, 2021

9 Last Update Posted: May 24, 2021

10

11 **Sponsor:** McGill University

12 **Information Provided by (Responsible Party):**

13 Rolando F. Del Maestro, McGill University

14

15 **Study Description**

---

16

17

18 **Brief Summary:**

19

20 Background:

21 Although surgical experience and technical skill are associated with better patient outcomes<sup>1-3</sup>,  
22 quantitating surgical ability in the operating room is challenging. In surgical education, large  
23 datasets generated by high-fidelity virtual reality simulators can be employed by machine  
24 learning algorithms to objectively measure trainee performance and competence on expert  
25 benchmarks<sup>4</sup>. This allows repetitive practice of surgical skills in safe and risk-free environments  
26 with immediate feedback.

27

28 Our group developed and has a patent pending for an intelligent tutoring system called the  
29 Virtual Operative Assistant (VOA)<sup>5,6</sup>. Utilizing a support vector machine algorithm, the VOA

30 assesses data derived from the NeuroVR (CAE Healthcare) simulator platform and provides  
31 individualized audiovisual feedback to improve learner performance during simulated brain  
32 tumor resections. The effectiveness of intelligent tutoring systems such as the VOA to the  
33 human surgical apprenticeship pedagogy remains to be elucidated.

34

35 The aim of this study is to compare the effectiveness and educational impact of personalized  
36 VOA feedback to expert instruction on medical student's technical skills learning of a virtual  
37 reality tumor resection procedure.

38

39 Specific Aims: 1) To assess if medical students receiving personalized VOA feedback statistically  
40 improve their surgical performance when compared to those having (a) no expert instructor  
41 feedback or (b) expert instructor-mediated feedback. 2) To outline if different emotions are  
42 elicited by the VOA intelligent tutoring system in medical students while performing this  
43 achievement task as compared to human instruction.

44

45 Design: A three-arm partially blinded randomized controlled trial of VOA training versus  
46 remote-based expert instruction versus control.

47

48 Setting: Neurosurgical Simulation and Artificial Intelligence Learning Centre, Montreal  
49 Neurological Institute.

50

51 Participants: Eligible Medicine-Preparatory (Med-P), first- and second-year medical students  
52 from across the province of Quebec.

53

54 Task: Complete removal of a simulated tumour – distinguishable by colour and haptic  
55 properties – with minimal bleeding and damage to surrounding healthy brain using two surgical  
56 instruments (Cavitron Ultrasonic Aspirator and Bipolar pincers) of the NeuroVR (CAE  
57 Healthcare) surgical simulator.

58 Intervention: A single 75-minute training session, including six virtual subpial tumour resection  
59 attempts (five simple practice scenarios and one complex realistic scenario) with assessment  
60 and feedback from either:

61 1) the VOA intelligent tutoring system (Group 2) or

62 2) a remote-based expert instructor (Group 3)

63 Both compared to:

64 3) control group (Group 1) that receives no assessment or performance feedback.

65

66 Main Outcomes and Measures:

67 Primary outcome is surgical performance improvement and learning. Performance  
68 improvement is measured as the difference between participant's attempts during the five  
69 practice attempts along four performance metric categories (Safety, Efficiency, Quality and  
70 Bimanual Cognitive) recorded by the simulator, assessed, classified and presented by previously  
71 established machine learning algorithms [4]. Learning is measured by the participant's  
72 composite performance score (obtained from blinded instructor assessment of videos and the  
73 simulator's assessment, both weighting 50%) on their performance of the more complex and  
74 realistic tumour resection scenario.

75

76 Secondary outcomes include the strength of emotions and level of cognitive load experienced  
77 by participants in each intervention arm, assessed through three questionnaires sets before,  
78 during and after the training intervention.

79

80 To our knowledge this will be the first study to compare the effectiveness of an AI-powered  
81 intelligent tutoring system to expert instruction in the context of medical and surgical virtual  
82 reality simulation and assess the emotional response to such instruction. This study aims to  
83 begin to identify successful approaches to use this innovative technology in the medical  
84 educational curriculum and improve patient outcomes by augmenting safety, efficiency and  
85 competency of surgeons and other healthcare providers.

86

| Condition or disease | Intervention/treatment                                                                                  | Phase             |
|----------------------|---------------------------------------------------------------------------------------------------------|-------------------|
| Surgical Education   | Behavioral: Virtual Operative Assistant Training<br>Behavioral: Remote-Based Expert Instructor Training | Not<br>Applicable |

87

88 **Detailed Description:**

89 Background

90 The advent of the ongoing COVID-19 pandemic has impacted medical education by limiting  
91 students’ access to hands-on surgical and clinical training. With uncertainty over how clerkship  
92 rotations are going to look, research on novel educational tools is required to offer solutions  
93 that prevent a gap in the learner’s technical competence. Technological advancements in the  
94 fields of virtual reality (VR) and artificial intelligence (AI), combined with a shift toward  
95 competency-based medical education have resulted in the development and validation of  
96 surgical simulators for residency training [4]. VR simulators can supplement the traditional  
97 apprenticeship-based model of training for surgeons, and other healthcare providers that  
98 depend on technical expertise, by providing learners with unlimited opportunities for repetitive  
99 practice in a risk-free environment. This would allow students to practice surgical and other  
100 technical skills without the limitations imposed by the need for supervision, case availability or  
101 learning environments. Simulators record an enormous amount of data during VR task  
102 performance. These datasets provide novel insights into surgical expertise, offer real-time  
103 procedural guidance, give automated feedback, and inform educators in developing objective  
104 assessment measures [4-6].

105

106 Rationale

107 A series of AI algorithms that accurately assess bimanual psychomotor surgical performance in  
108 a virtual subpial tumor resection task have been assessed and validated [5] and a patent for  
109 these systems, called the Virtual Operative Assistant (VOA), has recently been published  
110 (PCT/CA2020/050353, Title: A Framework For Transparent Artificial Intelligence In Simulation:  
111 The Virtual Operative Assistant, (WO 2020/186348) published in September 24, 2020) [6]. The

112 Virtual Operative Assistant involves software that uses machine learning algorithms and  
113 artificial neural networks to provide learners with personalized formative feedback based on  
114 their performance during a simulated neurosurgical procedure [5]. This AI-powered tutoring  
115 system analyses large multimodal data regarding an individual's bimanual psychomotor skills,  
116 compares it with data from an expert's performance in that task and suggests areas for  
117 improvement. However, the effectiveness of the VOA in improving surgical learning and  
118 performance compared to the traditional instructor-based method is not known.

119

## 120 Research Objectives

121 To compare the effectiveness of personalized VOA feedback to expert instruction on medical  
122 student's learning outcomes during simulated VR tumor resection procedures and examine  
123 which educational intervention results in: 1) better surgical performance and learning outcome  
124 (primary outcome) and 2) lower cognitive load and the activation of positively valence  
125 emotions that can support learning (secondary outcome).

126

## 127 Hypothesis

128 VOA feedback will 1) significantly improve medical student's performance compared to no  
129 feedback, 2) be non-inferior to expert-mediated feedback and 3) result in lower negative  
130 valence emotions.

131

## 132 **Study Design**

---

133

|             |                                                      |
|-------------|------------------------------------------------------|
| Study Type: | Interventional                                       |
| Enrollment: | 72 participants                                      |
| Allocation: | Parallel Assignment<br>Randomized, partially blinded |
| Masking:    | Double (Participant, Outcomes Assessor)              |

Participants do not know the performance metrics used in their final evaluation, only that they will be learning and practicing technical skills used in neurosurgery for subpial tumor resection procedures.

All participants are told that their on-screen performance is being observed by an expert in a different room.

Instructors assessing the performance videos for the realistic scenario are blinded to the participant's group assignment.

Primary Purpose: Health Services Research

Official Title: Comparing the Virtual Operative Assistant to Instructor-based Instruction in Surgical Education: A Randomized Controlled Trial

Actual Study Start

Date: January 15, 2021

Actual Primary

Completion Date: May 15, 2021

Actual Study

Completion Date: May 15, 2021

134

135 **Arms and Interventions**

136

| Arm                                                                                                                                                                                                                                                                                                                                                                                                                                                                     | Intervention/treatment                                                                                                                                                                                                      |
|-------------------------------------------------------------------------------------------------------------------------------------------------------------------------------------------------------------------------------------------------------------------------------------------------------------------------------------------------------------------------------------------------------------------------------------------------------------------------|-----------------------------------------------------------------------------------------------------------------------------------------------------------------------------------------------------------------------------|
| <p>Control Group – Baseline Training</p> <p>23 Participants allocated. Individuals receive introductory information on using the simulator and the scenario. They perform 5 simple subpial tumour resections for practice and have 5 minutes per trial. After each attempt, the student takes a 5-minute break with no assessment or feedback on their performance. On their 6<sup>th</sup> attempt they have 13 minutes to perform a different realistic scenario.</p> | <p>No assessment or feedback.</p> <p>The average performance improvement by this group will determine the baseline for learning possible with only using the simulator.</p>                                                 |
| <p>Experimental Group – VOA Training</p> <p>23 participants allocated. Individuals receive the same information, have the same amount of time and perform the same scenarios as the control group. In the 5-</p>                                                                                                                                                                                                                                                        | <p>VOA Assessment and Feedback.</p> <p>Students receive a percentage score of their performance based on their level of expertise in four performance metrics determined by the system's support vector machine. If the</p> |

|                                                                                                                                                                                                                                                                                                                                                                                                                                                                                                                                                                                                                                                                                                                                                                  |                                                                                                                                                                                                                                                                                                                                                                                                                                                                                                                                                                                                            |
|------------------------------------------------------------------------------------------------------------------------------------------------------------------------------------------------------------------------------------------------------------------------------------------------------------------------------------------------------------------------------------------------------------------------------------------------------------------------------------------------------------------------------------------------------------------------------------------------------------------------------------------------------------------------------------------------------------------------------------------------------------------|------------------------------------------------------------------------------------------------------------------------------------------------------------------------------------------------------------------------------------------------------------------------------------------------------------------------------------------------------------------------------------------------------------------------------------------------------------------------------------------------------------------------------------------------------------------------------------------------------------|
| <p>minutes between attempts, participant receive the VOA's assessment of their performance and audiovisual feedback.</p>                                                                                                                                                                                                                                                                                                                                                                                                                                                                                                                                                                                                                                         | <p>performance is outside the expert reference benchmark in a given metric, participants observe a feedback video which demonstrates an expert performance and provides constructive directional feedback to excel.</p>                                                                                                                                                                                                                                                                                                                                                                                    |
| <p>Experimental Group – remote-based expert Instructor Training</p> <p>23 participants allocated. Individuals receive the same information, have the same amount of time and perform the same scenarios as the control group. Meanwhile, a trained instructor observes the participant's on-screen performance, that is live-streamed, remotely. Instructors are senior neurosurgery residents with extensive experience in performing and assessing this scenario. During the 5-minute feedback session, they chat with the student, discussing the performance and help in setting goals for the next trial.</p> <p>NOTE: To control for Hawthorne (observer) effect, all participants are told that their performance is being streamed to an instructor.</p> | <p>Remote-based expert instructor assessment and feedback.</p> <p>As the participant performs the simulation, instructors grade the on-screen performance using a previously established an Objective Structured Assessment of Technical Skills (OSATS) Visual Rating Scale in six components (e.g., Respect for Tissue, Flow, and Efficiency of Movement) <sup>7</sup> on a 7-point Likert scale. During the feedback session, instructors select feedback statements from a standardized list, discuss the participant's areas of improvement and help them set specific goals for the next attempt.</p> |

137

138 **Outcome Measures**

139 Primary Outcome Measure:

140 1. Change in procedural performance

141 Performance in each practice attempt is measured utilizing raw data from the simulator that is  
 142 used for assessment by previously established AI algorithms on validated metrics (ICEMS  
 143 Expertise Score).

144

145 2. Change in learning  
146 Performance on the complex realistic scenario is evaluated by expert instructors using the  
147 OSATS Visual Rating Scale and the AI assessment algorithms (ICEMS Expertise Score).

148 Secondary Outcome Measure:

149 1. Difference in the strength of emotions elicited

150 Measured using Duffy's Medical Emotions Scale (MES)<sup>8</sup>, before, during and after the  
151 intervention.

152

153 2. Difference in cognitive load

154 Measured using Leppink's Cognitive Load Index (CLI)<sup>9</sup> after the intervention.

155

## 156 Eligibility Criteria

---

Ages Eligible for Study: 18 Years and older

Sexes Eligible for Study: All

Gender Based: No

Accepts Healthy Volunteers: Yes

157

## 158 Criteria

159 Inclusion Criteria:

- 160 • First- and second-year medical students from any Canadian institution who do not meet  
161 the exclusion criteria.

162 Exclusion Criteria:

- 163 • Participation in our group's previous trials involving the NeuroVR (CAE Healthcare)  
164 simulator.  
165 • Prior surgical clerkship experience.

166

## 167 Contacts and Locations

---

168 Locations

169 Canada, Quebec



170 Neurosurgical Simulation and Artificial Intelligence Learning Centre,  
171 Montreal Neurological Institute,  
172 McGill University, Montreal, H3A 2B4  
173 Quebec, Canada

174 **Investigators**

Principal Investigator: Rolando F. Del Maestro, MD PhD McGill University

175

176 **More Information**

---

Responsible Party: Rolando F. Del Maestro, William Feindel  
Professor Emeritus in Neuro-Oncology,  
McGill University

ClinicalTrials.gov Identifier: NCT04700384

Human Subjects Ethics Review Board Status: Approved

Ethics Review Board Project Number: 2010-270, NEU-09-042

Studies a U.S. FDA-regulated Drug Product: No

Studies a U.S. FDA-regulated Device Product: No

177

178 **Statistical Analysis Plan**

179 To achieve a statistical power of 0.80, considering a potential effect size of 35% and a  
180 significance level of 0.05, this study requires a minimum of 23 participants in each group. All  
181 collected participant data will be anonymized and kept in a locked cabinet. Participant  
182 characteristics are described as count with percentages, mean (SD) or median (IQR), as  
183 appropriate. Validated artificial intelligence algorithms will analyze raw performance data and  
184 evaluate the participant's performance utilizing previous established competence benchmarks  
185 for practice and realistic tumor resection scenarios.

186 Performance videos will be scored by blinded experts using previously published visual rating  
187 scales. Continuous data will be checked for outliers and tests of normality, sphericity, and  
188 homogeneity of variance will be conducted to check the assumptions of ANOVA. Emotions  
189 before, during, and after, and procedural performance in the 5 practice resections will be  
190 examined by a two-way mixed ANOVA using time as the within-subjects variable and group

191 allocation as the between-subjects variable. Baseline performance (i.e., performance in the first  
192 practice subpial resection) will be treated as a covariate in the mixed model for procedural  
193 performance analysis. Post-intervention responses to the CLI will be summarized for each group  
194 and evaluated using one-way ANOVA. Before recruitment, inter-rater reliability will be  
195 evaluated using intraclass correlation coefficient and OSATS scale consistency will be examined  
196 using Cronbach's alpha from data gathered from instructor training.

197 All statistical tests will be conducted in SPSS version 27 (IBM Corporation, 2020 release,  
198 Armonk, New York, United States). Expertise Score predictions were conducted in MATLAB  
199 R2020a release (MathWorks Inc., Natick, Massachusetts, United States).

200

201 References:

- 202 1. Birkmeyer JD, Finks JF, O'Reilly A, et al. Surgical Skill and Complication Rates after  
203 Bariatric Surgery. *New England Journal of Medicine*. 2013;369(15):1434-1442.
- 204 2. Birkmeyer JD, Stukel TA, Siewers AE, Goodney PP, Wennberg DE, Lucas FL. Surgeon  
205 Volume and Operative Mortality in the United States. *New England Journal of Medicine*.  
206 2003;349(22):2117-2127.
- 207 3. Stulberg JJ, Huang R, Kreutzer L, et al. Association Between Surgeon Technical Skills and  
208 Patient Outcomes. *JAMA Surgery*. 2020;155(10):960-968.
- 209 4. Winkler-Schwartz A, Yilmaz R, Mirchi N, et al. Machine Learning Identification of Surgical  
210 and Operative Factors Associated With Surgical Expertise in Virtual Reality Simulation.  
211 *JAMA Network Open*. 2019;2(8):e198363-e198363.
- 212 5. Mirchi N, Bissonnette V, Yilmaz R, Ledwos N, Winkler-Schwartz A, Del Maestro RF. The  
213 Virtual Operative Assistant: An explainable artificial intelligence tool for simulation-  
214 based training in surgery and medicine. *PLOS ONE*. 2020;15(2):e0229596.
- 215 6. Mirchi N, Yilmaz R, Winkler-Schwartz A, Bissonnette V, Ledwos N, Del Maestro R,  
216 Inventors. A FRAMEWORK FOR TRANSPARENT ARTIFICIAL INTELLIGENCE IN  
217 SIMULATION: THE VIRTUAL OPERATIVE ASSISTANT. 24 September 2020, 2020.
- 218 7. Winkler-Schwartz A, Marwa I, Bajunaid K, et al. A Comparison of Visual Rating Scales and  
219 Simulated Virtual Reality Metrics in Neurosurgical Training: A Generalizability Theory  
220 Study. *World Neurosurgery*. 2019;127:e230-e235.
- 221 8. Duffy MC, Lajoie SP, Pekrun R, Lachapelle K. Emotions in medical education: Examining  
222 the validity of the Medical Emotion Scale (MES) across authentic medical learning  
223 environments. *Learning and Instruction*. 2020;70:101150.
- 224 9. Leppink J, Paas F, Van der Vleuten CPM, Van Gog T, Van Merriënboer JIG. Development  
225 of an instrument for measuring different types of cognitive load. *Behavior Research*  
226 *Methods*. 2013;45(4):1058-1072.
- 227
