# Supplementary material for: Effect of Artificial Intelligence Tutoring vs Expert Instruction on Learning Simulated Surgical Skills Among Medical Students: A Randomized Clinical Trial
Source: PubMed Central journal article supplement (PMC8864513; doi:10.1001/jamanetworkopen.2021.49008), 2022-02-22
Supplement: jamanetwopen-e2149008-s003.pdf [file jamanetwopen-e2149008-s003.pdf]

## Data Sharing Statement

Fazlollahi. Effect of Artificial Intelligence Tutoring vs Expert Instruction on Learning Simulated Surgical Skills Among Medical Students. *JAMA Netw Open*. Published February 22, 2022. doi:10.1001/jamanetworkopen.2021.49008

### Data

**Data available:** Yes

**Data types:** Deidentified participant data

**How to access data:** Upon request from authors Fazlollahi and Del Maestro. Contact [ali.fazlollahi@mail.mcgill.ca](mailto:ali.fazlollahi@mail.mcgill.ca) and [rolando.del\\_maestro@mcgill.ca](mailto:rolando.del_maestro@mcgill.ca).

**When available:** With publication

### Supporting Documents

**Document types:** None

### Additional Information

**Who can access the data:** Researchers whose proposed use of the data has been approved.

**Types of analyses:** Any purpose.

**Mechanisms of data availability:** With a signed data access agreement.
